# Supplementary material for: Layer-by-layer assembly of low-temperature-imprinted poly(methacrylic acid)/gold nanoparticle hybrids for gaseous formaldehyde mass sensing
Source: Royal Society of Chemistry journal article supplement (doi:10.1039/c4ra06230b), 2014-01-01
Supplement: c4ra06230b1.pdf [file c4ra06230b1.pdf]

## Layer-by-layer assembly of low-temperature-imprinted poly(methacrylic acid)/gold nanoparticle hybrids for gaseous formaldehyde mass sensing

Naseer Iqbal, Adeel Afzal\*, and Adnan Mujahid

\*Corresponding author: +966 (0) 13 720 3426 x 1675; Email: [aa@aafzal.com](mailto:aa@aafzal.com)

### Electronic Supplementary Information

**Figure S1.** 3D surface plot of molecularly imprinted poly(methacrylic acid) [imp-PMAA] layer.

**Figure S2.** 3D surface plot of gold nanoparticles [Au-NPs] layer.

**Figure S3.** 3D surface plot of molecularly imprinted poly(methacrylic acid)/gold nanoparticles [imp-PMAA/Au-NPs] hybrid layer.

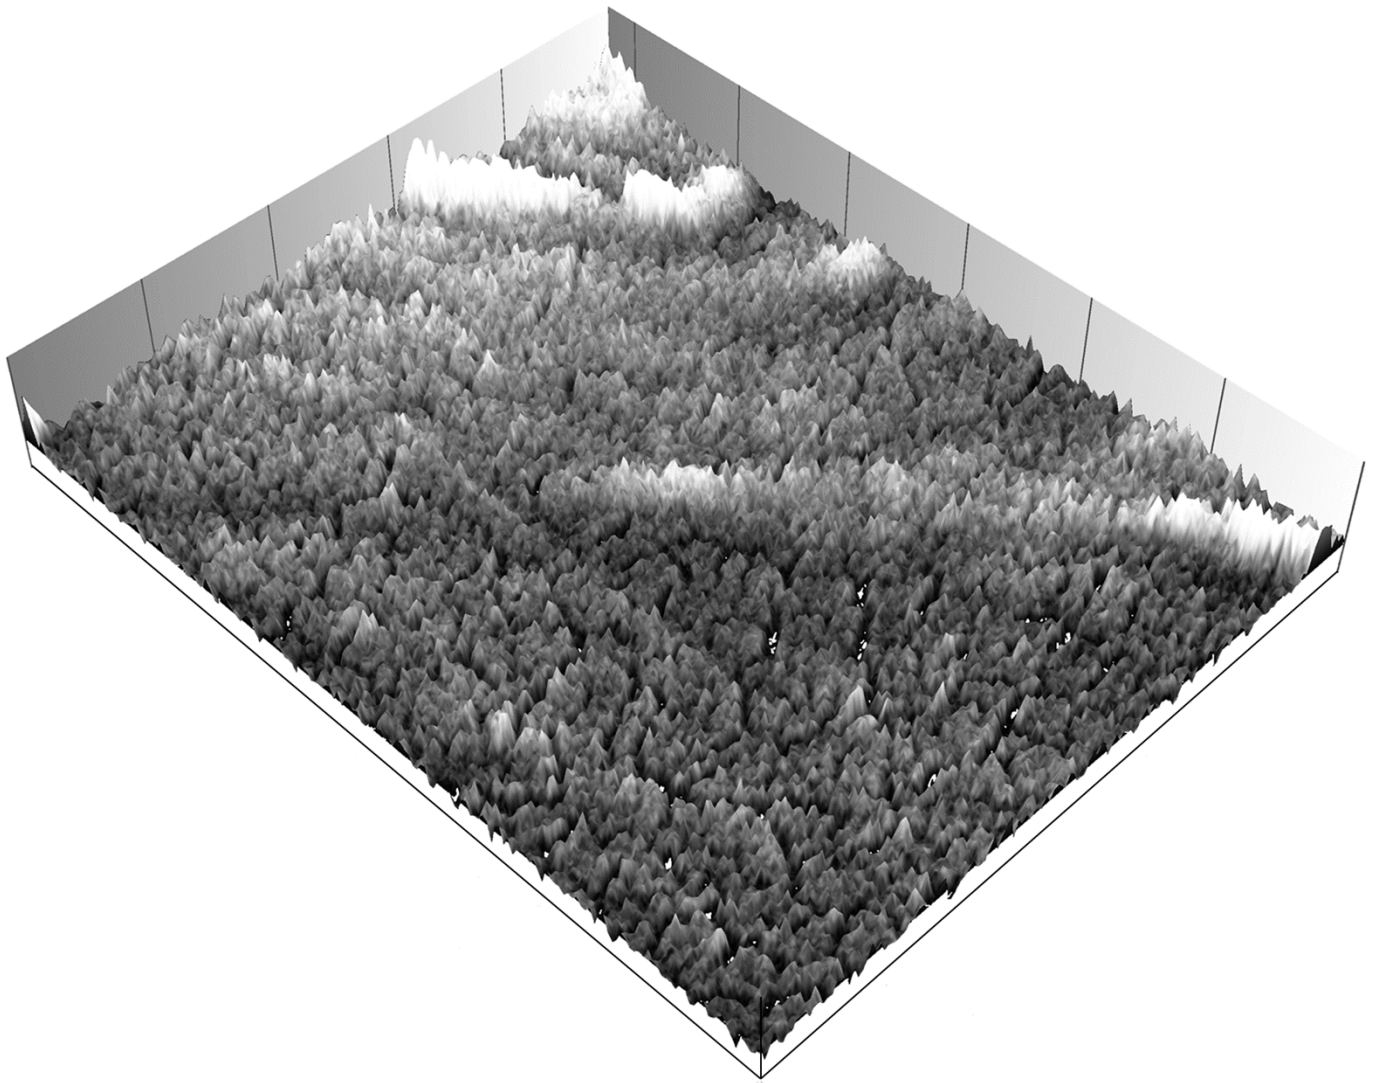

**Figure S1.** 3D surface plot of molecularly imprinted poly(methacrylic acid) [imp-PMAA] layer, dimensions: ca. 0.40 x 0.62 x 0.10  $\mu\text{m}$ .

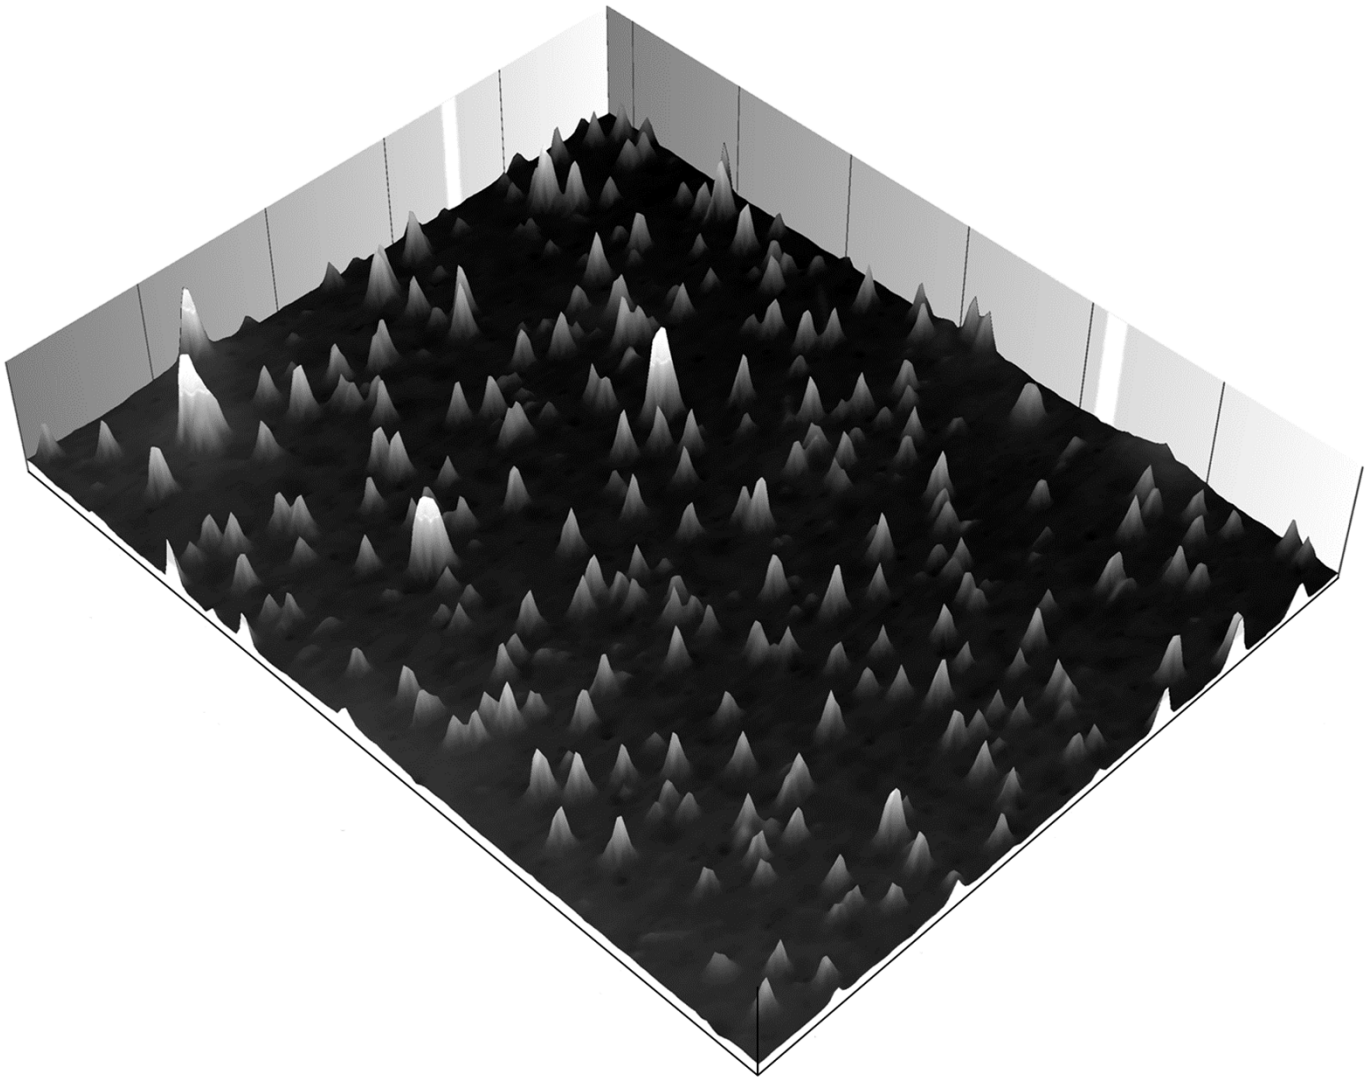

**Figure S2.** 3D surface plot of gold nanoparticles [Au-NPs] layer, dimensions: ca. 0.40 x 0.62 x 0.08  $\mu\text{m}$ .

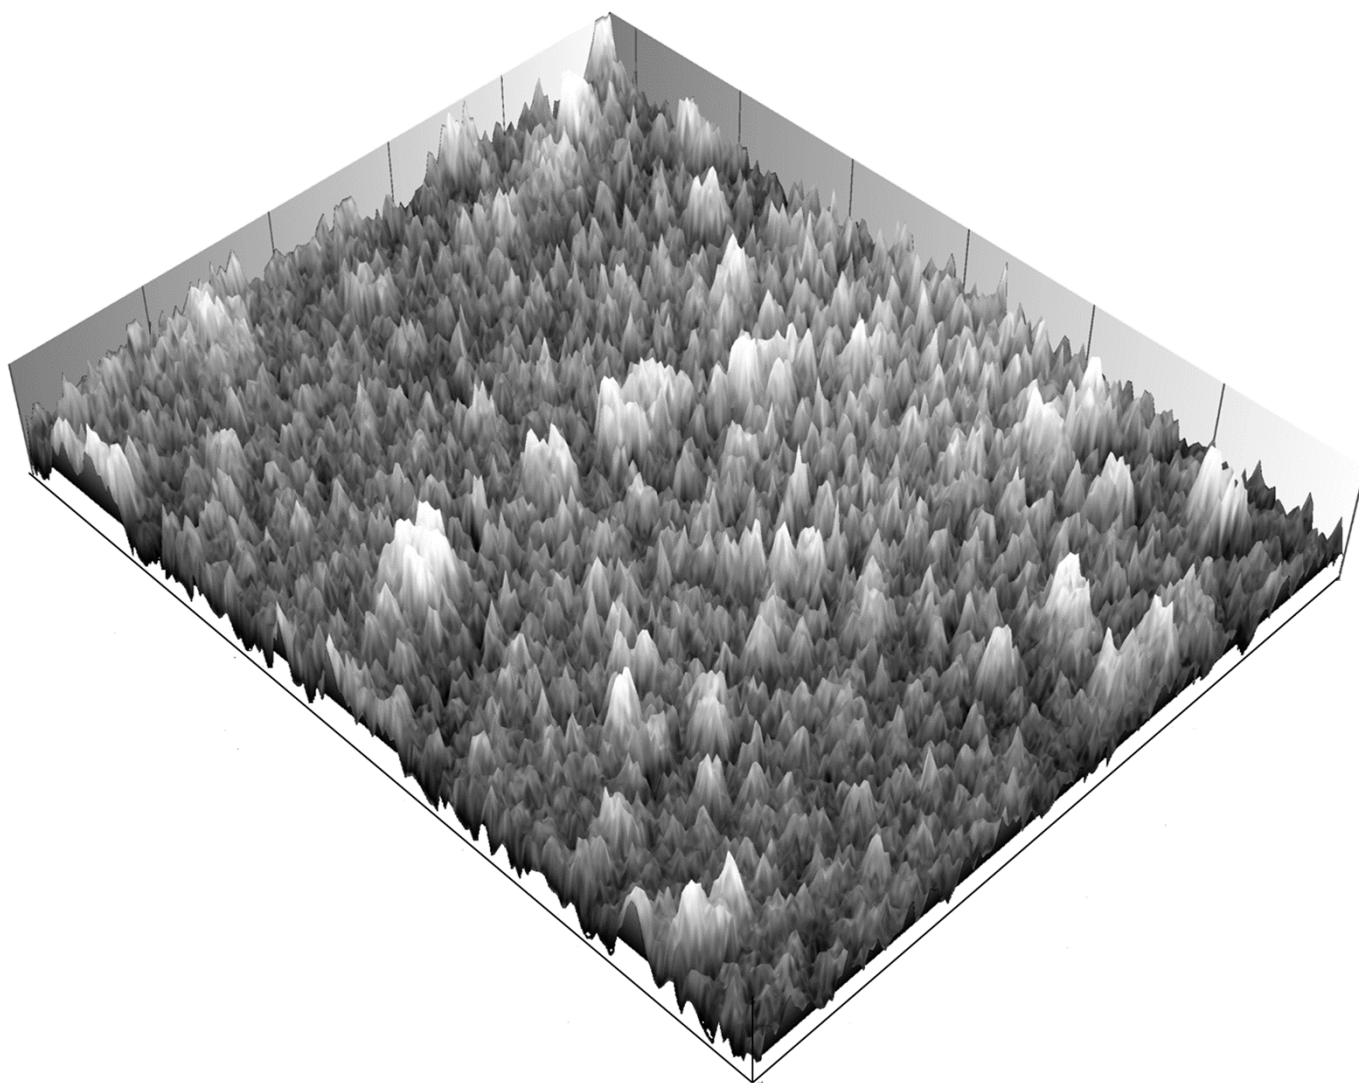

**Figure S3.** 3D surface plot of molecularly imprinted poly(methacrylic acid)/gold nanoparticles [imp-PMAA/Au-NPs] hybrid layer, dimensions: ca. 0.40 x 0.62 x 0.12  $\mu\text{m}$ .
